# Supplementary material for: Carbon dots–MnO2 nanocomposites for As(iii) detection in groundwater with high sensitivity and selectivity
Source: Royal Society of Chemistry journal article supplement (doi:10.1039/d0ay01846e), 2020-01-01
Supplement: d0ay01846e1.pdf [file d0ay01846e1.pdf]

## Supporting Information

### **Carbon dots-MnO<sub>2</sub> nanocomposites for As(III) detection in groundwater with high sensitivity and selectivity**

Xiaoyu He, Yong Li\*, Chao Yang, Liqiang Lu, Yulun Nie, Xike Tian

Faculty of Materials Science and Chemistry, China University of Geosciences, Wuhan 430074, PR China

\*Corresponding author. Email: liyong07@126.com

#### **Figure captions:**

**Fig. S1** UV absorption spectra (a), fluorescence excitation spectra (b) and emission spectra (c) of CDs. *Inset* is images of CDs under sunlight (I) and UV light (II).

**Fig. S2** Fluorescence emission spectra of CDs (a), UV absorption spectra of MnO<sub>2</sub> NSs (b) and KMnO<sub>4</sub> (c) in water.

**Fig. S3** (a) Fluorescence response of CDs (5 µg/mL) in the presence of increasing concentrations of KMnO<sub>4</sub>, and (b) fluorescence intensity changes of CDs (5 µg/mL) *versus* the concentrations of KMnO<sub>4</sub>.

**Fig. S4** Fluorescence intensity changes of CDs-MnO<sub>2</sub> nanocomposites. (a) In the presence of NaCl with different concentrations; (b) Standing for 0-120 min; (c) After synthesis repeats for 6 times.

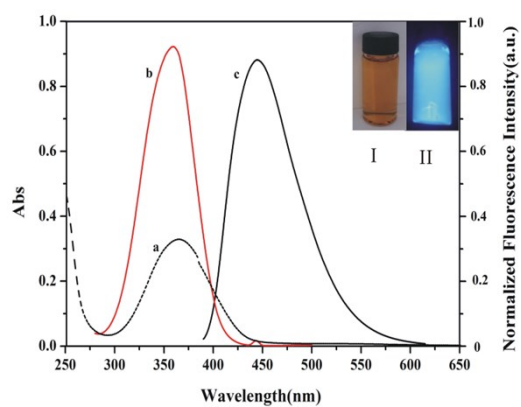

**Fig. S1** UV absorption spectra (a), fluorescence excitation spectra (b) and emission spectra (c) of CDs. *Inset* are the images of CDs solution under sunlight (I) and UV light (II).

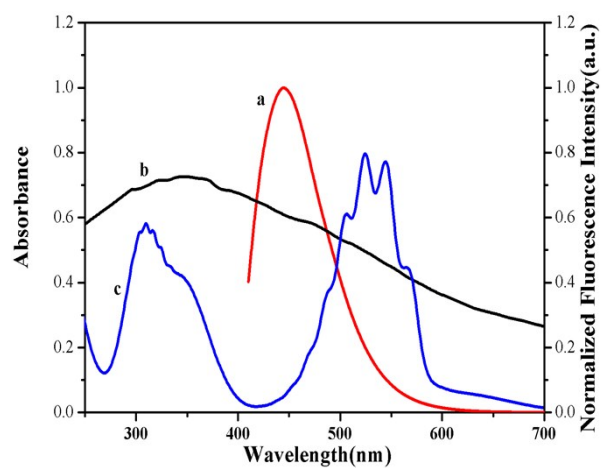

**Fig. S2** Fluorescence emission spectra of CDs (a), UV absorption spectra of MnO<sub>2</sub> NSs (b) and KMnO<sub>4</sub> (c) in water.

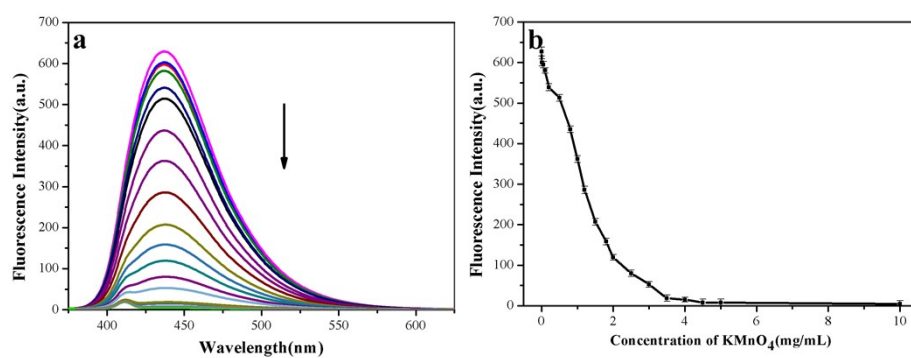

**Fig. S3** (a) Fluorescence response of CDs (5 µg/mL) in the presence of increasing concentrations of  $\text{KMnO}_4$ , and (b) fluorescence intensity changes of CDs (5 µg/mL) *versus* the concentrations of  $\text{KMnO}_4$ .

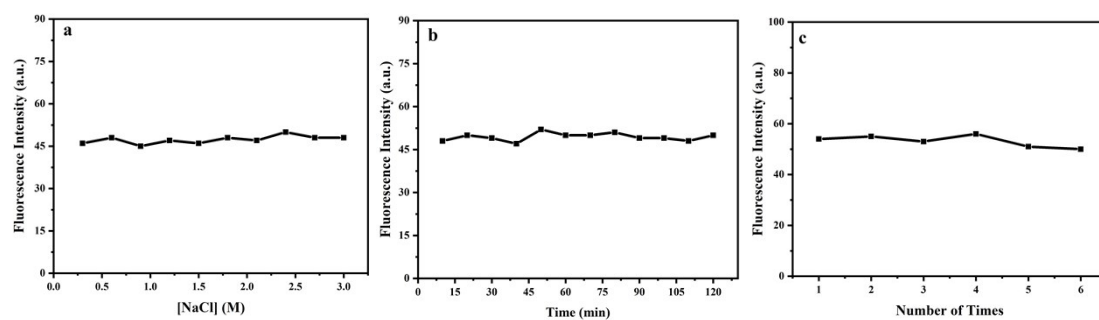

**Fig. S4** Fluorescence intensity changes of CDs-MnO<sub>2</sub> nanocomposites. (a) In the presence of NaCl with different concentrations; (b) Standing for 0-120 min; (c) After synthesis repeats for 6 times.
